# Supplementary material for: Label-free emission assay of mercuric ions using DNA duplexes of poly(dT)
Source: Royal Society of Chemistry journal article supplement (doi:10.1039/c1dt10083a), 2011-01-01
Supplement: c1dt10083a.pdf [file c1dt10083a.pdf]

1 **Supporting Information**

2  
3 **Label-free Emission Assay of Mercuric Ions Using DNA Duplexes of**  
4 **Poly(dT)**

5  
6 Byul Nim Oh,<sup>1</sup> Sangji Park,<sup>1</sup> Jun Ren,<sup>1</sup> Yoon Jung Jang,<sup>2</sup> Seog K. Kim,<sup>2</sup> Jinheung Kim<sup>1\*</sup>

7  
8  
9 [\*] B. N. Oh, S. Park, Dr. J. Ren, Prof. Dr. J. Kim

10 Department of Chemistry and Nano Science

11 Ewha Womans University

12 Seoul 120-750, Korea

13 Fax: (+82) 2-3277-3643

14 E-mail: jinheung@ewha.ac.kr

15  
16 Dr. Y. J. Jang, Prof. Dr. S. K. Kim

17 Department of Chemistry

18 Youngnam University

19 Daegu 120-750, Korea

20  
21  
22 [\*\*] This research is supported by the SRC/ERC program of MOST/KOSEF (R11-2005-008-  
23 000-0), BioGreen21 Program, Rural Development Administration (#2008), National  
24 Research Foundation of Korea Grant funded by the Korean Government (2009-0087304  
25 and 2010-0009525), Ewha Womans University (to JR), and BK21 (to SL and BNO).

26  
[Insert running title of <72 characters]

1

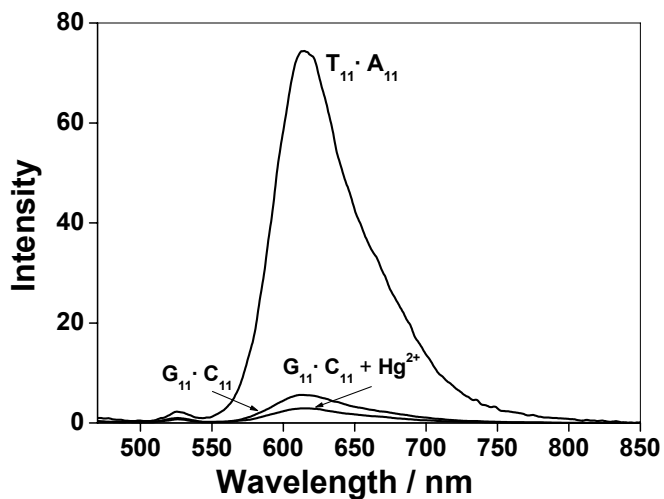

2

3

4

5

6

7 **Figure S1.** Emission spectra ( $\lambda_{\text{ex}} = 480 \text{ nm}$ ) of **1** in the presence of  $0.10 \mu\text{M } G_{11}\cdot C_{11}$

8 without and with 10 equiv  $\text{Hg}^{2+}$  in phosphate buffer ( $\text{pH} = 7.0$ ). These emission spectra were

9 plotted with that of  $T_{11}\cdot A_{11}$  for comparison.

10

11

[Insert running title of <72 characters]

1  
2  
3

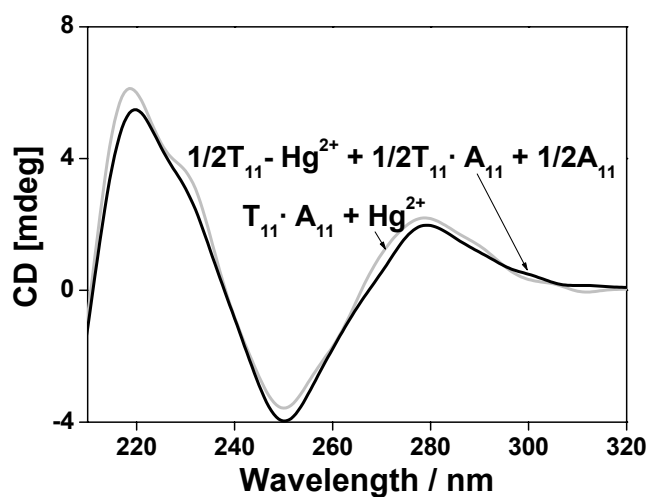

4  
5  
6  
7  
8  
9  
10

11 **Figure S2.** Circular dichroism spectra collected with 1.0  $\mu\text{M}$   $\text{T}_{11}\cdot\text{A}_{11}$  treated with 5 equiv  $\text{Hg}^{2+}$   
12 (gray line) and the mixture of 0.5  $\mu\text{M}$   $\text{T}_{11}\cdot\text{A}_{11}$  + 0.5 nM  $\text{A}_{11}$  +  $\text{T}_{11}\cdot\text{Hg}^{2+}\cdot\text{T}_{11}$  prepared with 0.5  
13  $\mu\text{M}$   $\text{T}_{11}$  and 5 equiv  $\text{Hg}^{2+}$  (black) in 10 mM phosphate buffer (pH = 7.0).

[Insert running title of <72 characters]

1  
2  
3

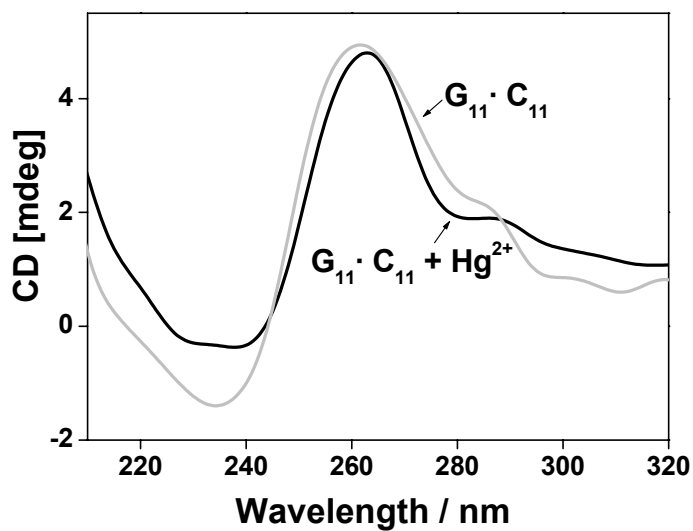

4  
5  
6  
7  
8  
9

10 **Figure S3.** Circular dichroism spectra collected with 1.0  $\mu$ M  $G_{11} \cdot C_{11}$  (gray line) and 1.0  $\mu$ M  
11  $G_{11} \cdot C_{11}$  treated with 10 equiv  $Hg^{2+}$  (black) in phosphate buffer (pH = 7.0).

12

[Insert running title of <72 characters]

1

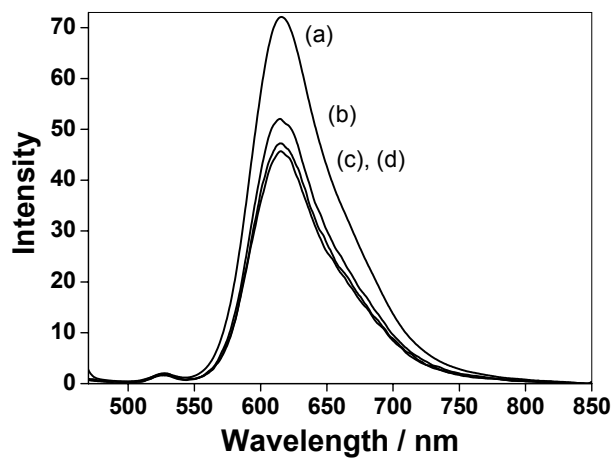

2

3

4

5

6

7

8 **Figure S4.** Emission spectra of **1** with (a) T<sub>11</sub>·A<sub>11</sub>, (b) T<sub>10</sub>G·A<sub>11</sub>, (c) T<sub>10</sub>C·A<sub>11</sub>, and (d) T<sub>10</sub>A·A<sub>11</sub>

9 (each 0.10 μM) in 10 mM phosphate buffer.

10

[Insert running title of <72 characters]
